# Supplementary material
Source: PubMed Central journal article supplement (PMC4841003)
Supplement: Supp_Fig1.pdf [file Supp_Fig1.pdf]

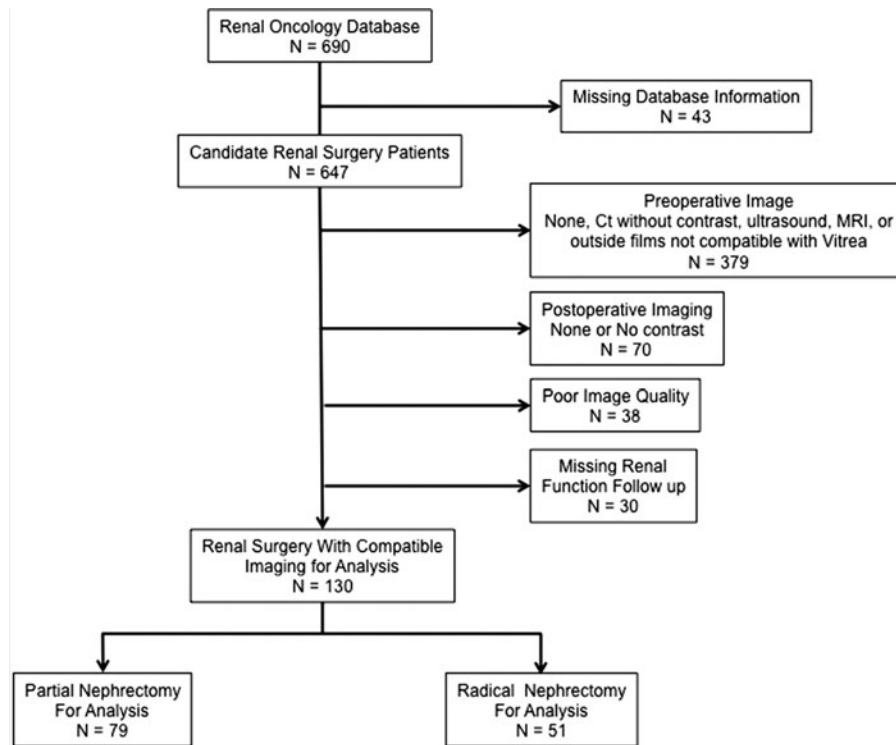

**SUPPLEMENTARY FIG. S1.** A flow diagram demonstrates the selection and exclusion process by which the original population was obtained for evaluation. The final population was examined against the entire database cohort to determine there were no substantial differences between groups ( $P > 0.05$ ).
