# Supplementary material
Source: PubMed Central journal article supplement (PMC4841003)
Supplement: Supp_Fig2.pdf [file Supp_Fig2.pdf]

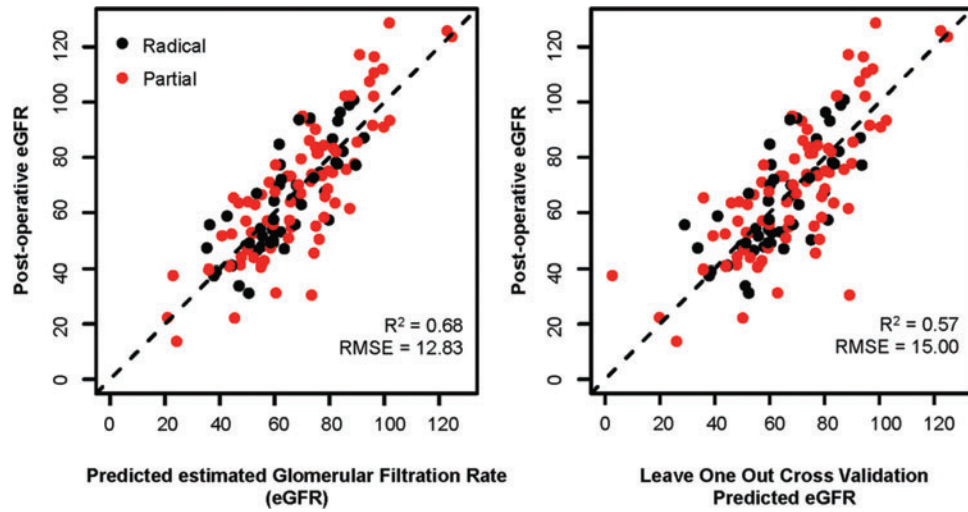

**SUPPLEMENTARY FIG. S2.** (*Left*) Model predictions of eGFR at 6 months after surgery. Scatter plot of actual compared with predicted eGFR in our cohort with a regression line to determine correlation. (*Right*) Using the leave-one-out cross-validation. Scatter plot of actual compared with predicted model using leave-one-out cross validation in our cohort with a regression line to determine correlation and assume no overfitting. RMSE=root mean square error.
