# Supplementary material
Source: PubMed Central journal article supplement (PMC4841003)
Supplement: Supp_Fig4.pdf [file Supp_Fig4.pdf]

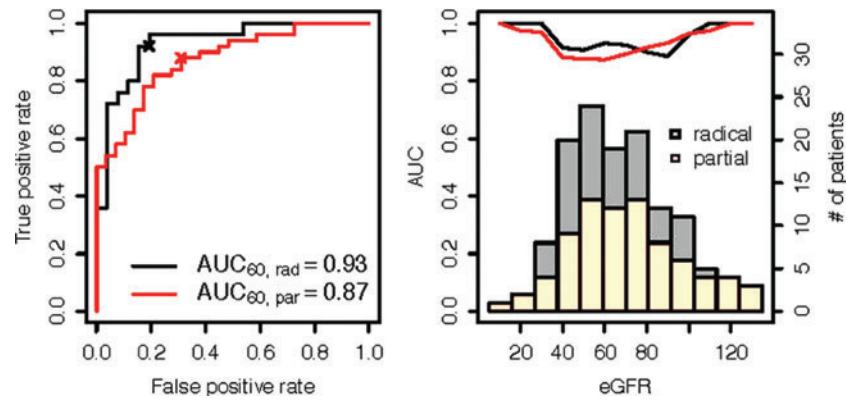

**SUPPLEMENTARY FIG. S4.** Receiver operating characteristic (ROC) for the predicted and actual chronic kidney disease after surgery (estimated glomerular filtration rate [eGFR] <60). (*Left*) Two ROC curves are displayed for noting the predictive ability in radical nephrectomy compared with partial nephrectomy. (*Right*) Histogram to demonstrate the number of patients (right x-axis) at various cut point values in eGFR. The red bar represents the number of partial nephrectomies (nephron-sparing surgery, i.e., NSS), and the grey represents the number of radical nephrectomies (RN) in the model. The lines at the top are color coordinated with NSS and RN to represent the individual predictive ability of each cut point by area under the curve (AUC) represented at the left x-axis.
